# Supplementary material for: Delivery of Cinnamic Aldehyde Antioxidant Response Activating nanoParticles (ARAPas) for Vascular Applications
Source: MDPI journal article supplement (doi:10.3390/antiox10050709), 2021-04-29
Supplement: s1 [file s1]

**Delivery of Cinnamic Aldehyde Antioxidant Response Acti-vating nanoParticles  
(ARAPas) for Vascular Applications**

Ana E. Cartaya <sup>1,2,3,†</sup>, Halle Lutz <sup>3,†</sup>, Sophie Maiocchi <sup>1,2</sup>, Morgan Nalesnik <sup>4</sup>, and Edward S. M.  
Bahnson <sup>1,2,3,4,5,\*</sup>

<sup>1</sup>Department of Surgery, Division of Vascular Surgery, <sup>2</sup>Center for Nanotechnology in Drug  
Delivery, <sup>3</sup>Department of Pharmacology, <sup>4</sup> Curriculum in Toxicology & Environmental Medicine,

<sup>5</sup>Department of Cell Biology & Physiology, and McAllister Heart Institute. University of North  
Carolina at Chapel Hill, NC 27599

† AEC and HL contributed equally and share first authorship

\*To whom correspondence should be addressed:

Edward Moreira Bahnson, PhD.

Center for Nanotechnology in Drug Delivery

125 Mason Farm Rd, Office 2102. University of North Carolina at Chapel Hill

Chapel Hill, NC 27599

Tel 919-843-0842

Email: [edward\\_bahnson@med.unc.edu](mailto:edward_bahnson@med.unc.edu)

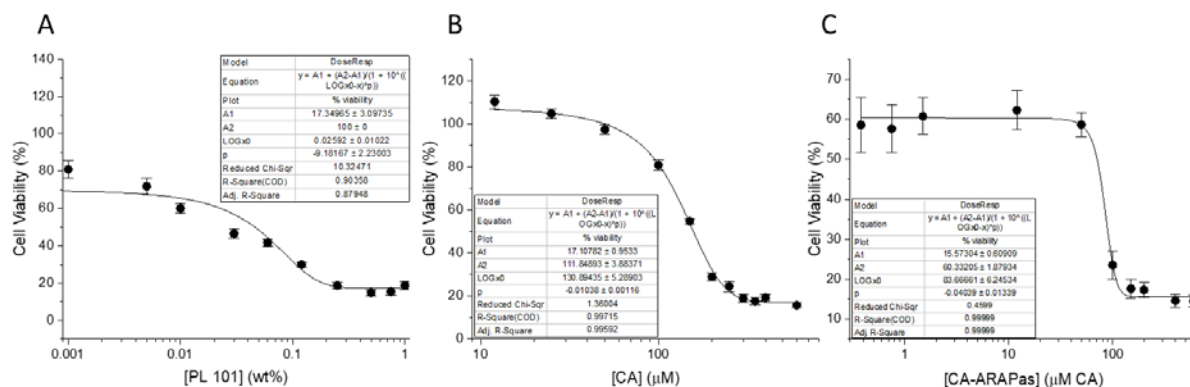

**Figure S1. MTT assay for VSMC treated with PL101, CA, or CA-ARAPas.** Vascular smooth muscle cell were treated with various concentrations of (A) Pluronic L101, (B) Cinnamic Aldehyde, and (C) CA-ARAPas (at 0.01wt% of Pluronic L101). Dose-Response curve was fit using OriginPro and the EC50 calculated and presented in figure 3 of the main text.

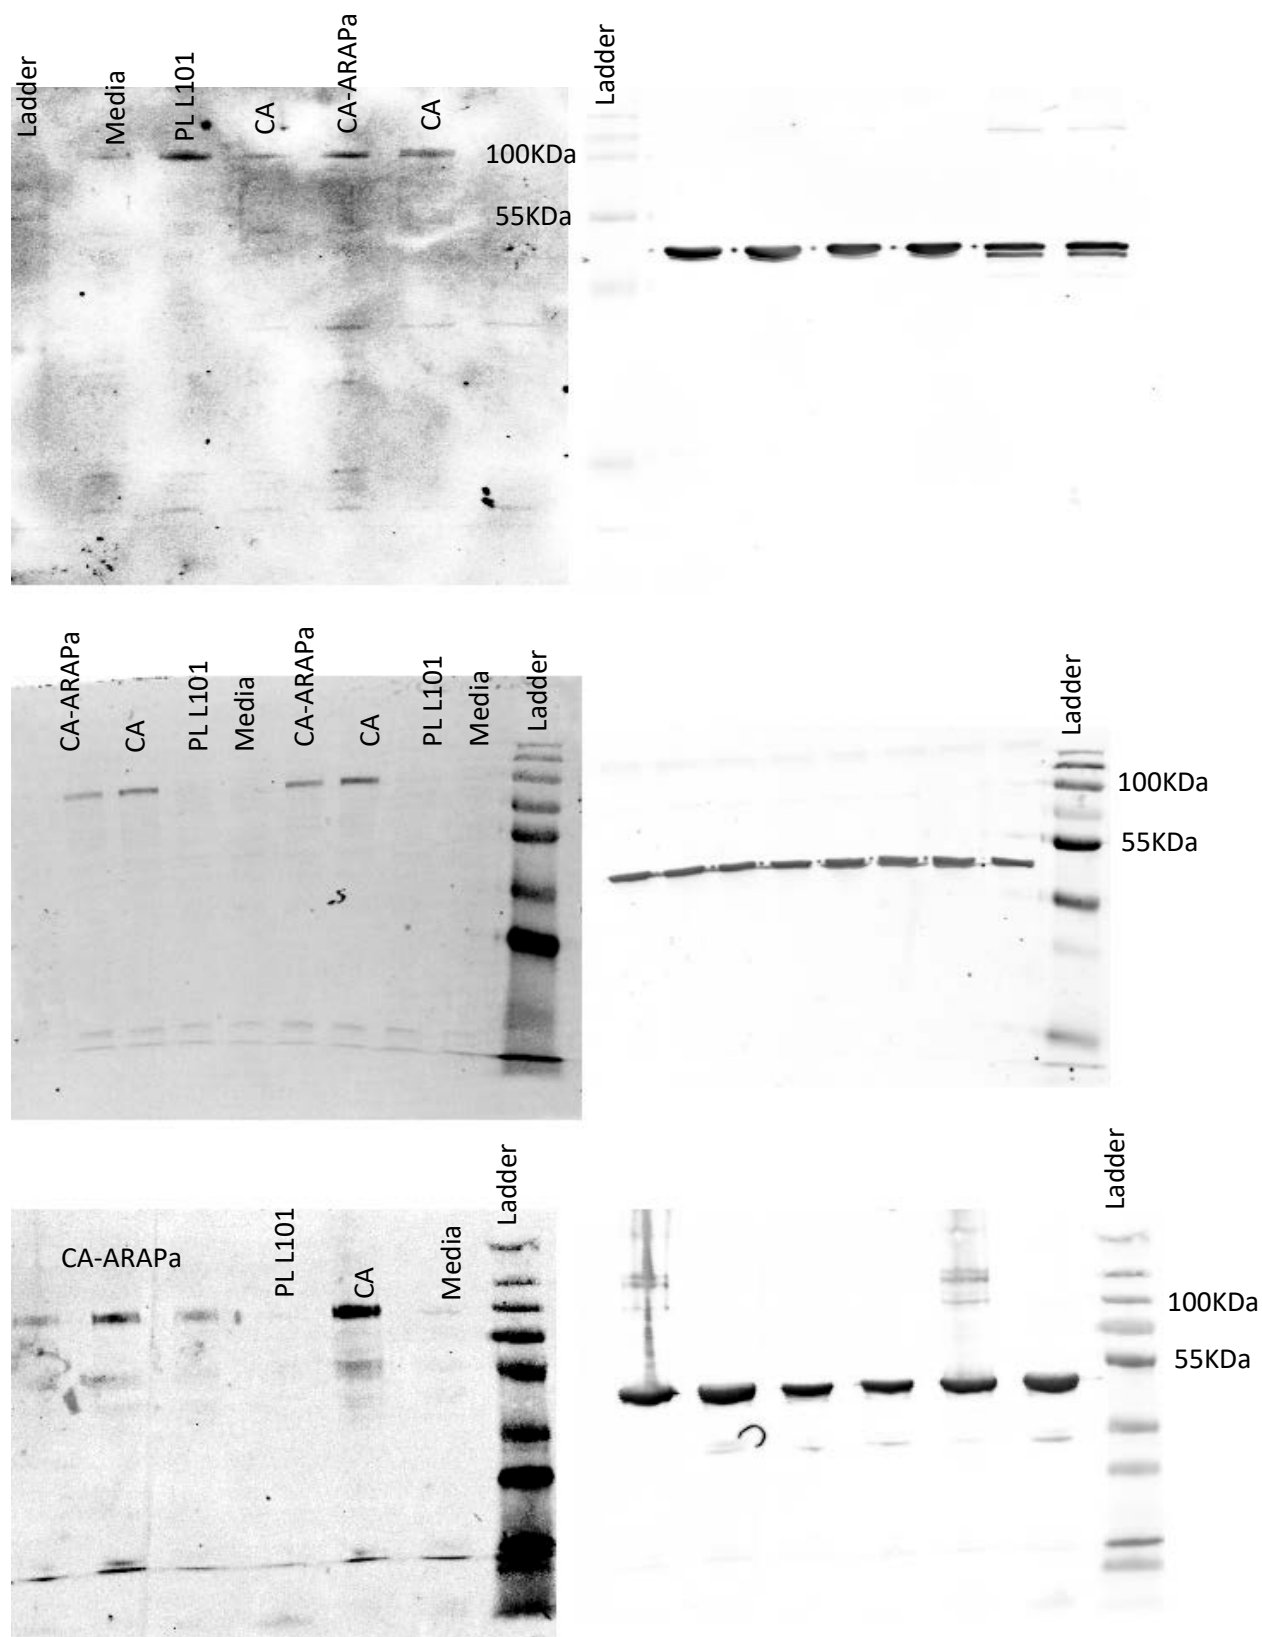

**Figure S2. Whole membranes for the Nrf2 WB.** Vascular smooth muscle cell were treated (A) Pluronic L101 (0.05%), Cinnamic Aldehyde (100  $\mu$ M), or CA-ARAPas (Pluronic L101 0.05% - CA 100  $\mu$ M). To the left, the mebranes were probed against Nrf2, to the right the same mebranes show the corresponding loading controls probing against  $\beta$ -actin.
